# Supplementary material for: Factors Influencing Inappropriate Use of Antibiotics in Infants under 3 Years of Age in Primary Care: A Qualitative Study of the Paediatricians’ Perceptions
Source: Antibiotics (Basel). 2023 Apr 7;12(4):727. doi: 10.3390/antibiotics12040727 (PMC10135072; doi:10.3390/antibiotics12040727)
Supplement: Supplementary file 1 [file antibiotics-12-00727-s001.zip]

Archive with 4 entries (4 files):
- S4. Informed consent.pdf
- Table S1. Participantí»s demographic characteristics.pdf
- Table S2. FGD Guide.pdf
- Table S3_COREQ_Checklist.pdf
