# Supplementary material for: Factors Influencing Inappropriate Use of Antibiotics in Infants under 3 Years of Age in Primary Care: A Qualitative Study of the Paediatricians’ Perceptions
Source: Antibiotics (Basel). 2023 Apr 7;12(4):727. doi: 10.3390/antibiotics12040727 (PMC10135072; doi:10.3390/antibiotics12040727)
Supplement: Supplementary file 1 [file antibiotics-12-00727-s001.zip › Table S1. Participantí»s demographic characteristics.pdf]

**Table S1.** The Focus group discussion participation and participant's demographic characteristics

| Health Area (HA)         |       | Focus Group Discussion (FGD)<br>n° participants |       |  |
|--------------------------|-------|-------------------------------------------------|-------|--|
| HA                       | FGD1  | FGD2                                            | FGD3  |  |
| HA-I                     | 2     | 1                                               | 2     |  |
| HA-II                    | 1     | 1                                               | 2     |  |
| HA-III                   | 1     | 1                                               | 1     |  |
| HA-IV                    |       | 1                                               | 1     |  |
| HA-V                     |       | 1                                               | 1     |  |
| HA-VI                    | 1     |                                                 | 1     |  |
| HA-VII                   | 1     | 1                                               | 1     |  |
| HA-VIII                  | 1     | 1                                               |       |  |
| HA-IX                    | 1     | 1                                               |       |  |
| <b>Gender</b>            |       |                                                 |       |  |
| Female                   | 4     | 5                                               | 4     |  |
| Male                     | 4     | 3                                               | 5     |  |
| <b>Years of Practice</b> |       |                                                 |       |  |
| 1-5                      | 1     | 2                                               | 1     |  |
| 5-10                     | 2     | 1                                               | 2     |  |
| 15-20                    |       | 1                                               | 1     |  |
| 20-25                    | 1     | 1                                               | 2     |  |
| 25-30                    | 2     | 2                                               | 1     |  |
| 30-35                    | 2     | 1                                               | 2     |  |
| <b>Age Range</b>         |       |                                                 |       |  |
|                          | 28-63 | 32-59                                           | 30-65 |  |
